# Supplementary material for: Transcriptome Profiling of Human Monocyte-Derived Macrophages Upon CCL2 Neutralization Reveals an Association Between Activation of Innate Immune Pathways and Restriction of HIV-1 Gene Expression
Source: Front Immunol. 2020 Sep 18;11:2129. doi: 10.3389/fimmu.2020.02129 (PMC7531389; doi:10.3389/fimmu.2020.02129)
Supplement: Supplementary file 2 [file Data_Sheet_2.zip]

Archive with 7 entries (7 files):
- Supplementary Figure S1.PDF
- Supplementary Figure S2.PDF
- Supplementary Figure S3.PDF
- Supplementary Figure S4.PDF
- Supplementary Figure S5.PDF
- Supplementary Figure S6.PDF
- Supplementary Figure S7.PDF
